# Supplementary material for: Architectural evolution in cocoons spun by Hyalophora (Lepidoptera; Saturniidae) silk moth species
Source: PubMed Central journal article supplement (PMC7101368; doi:10.1038/s41598-020-62547-1), 2020-03-27
Supplement: 41598_2020_62547_MOESM2_ESM.pdf [file 41598_2020_62547_MOESM2_ESM.pdf]

**Supplementary Data.** List of compiled COI barcode data used in phylogenetic analysis.

| <b>Genbank ID and initial proposed species</b> | <b>species assignment following initial phylogenetic reconstructions.</b> |
|------------------------------------------------|---------------------------------------------------------------------------|
| AB015868_Hyalophora_cecropia                   | Hyalophora_cecropia                                                       |
| AY165720_Hyalophora_cecropia                   | Hyalophora_cecropia                                                       |
| GU702999_H_gloveri_a                           | Hyalophora_columbia                                                       |
| GU703000_H_euryalus_kasloensis                 | Hyalophora_euryalus                                                       |
| GU703001_H_euryalus                            | Hyalophora_euryalus                                                       |
| GU703002_H_euryalus                            | Hyalophora_euryalus                                                       |
| GU703009_H_mexicana_PT                         | Hyalophora_mexicana                                                       |
| GU703460_H_mexicana_PT                         | Hyalophora_mexicana                                                       |
| GU703461_H_mexicana_HT                         | Hyalophora_mexicana                                                       |
| GU703462_H_mexicana_PT                         | Hyalophora_mexicana                                                       |
| GU703463_H_cecropia                            | Hyalophora_cecropia                                                       |
| GU703464_H_columbia_a                          | Hyalophora_columbia                                                       |
| GU703465_H_columbia_a                          | Hyalophora_columbia                                                       |
| GU703533_H_gloveri_b                           | Hyalophora_gloveri_b                                                      |
| GU703534_H_gloveri_b                           | Hyalophora_gloveri_b                                                      |
| GU703535_H_euryalus                            | Hyalophora_euryalus                                                       |
| GU703536_H_euryalus                            | Hyalophora_euryalus                                                       |
| GWNC613_07_Hyalophora_gloveri_Alberta          | Hyalophora_columbia                                                       |
| HM383529_H_columbia                            | Hyalophora_columbia                                                       |
| HM867376_Hyalophora_euryalus                   | Hyalophora_euryalus                                                       |
| HM867407_Hyalophora_euryalus                   | Hyalophora_euryalus                                                       |
| HQ579813_C_promethea                           | Callosamia_promethea                                                      |
| HQ579814_H_columbia                            | Hyalophora_columbia                                                       |
| HQ579815_H_columbia_a                          | Hyalophora_columbia                                                       |
| HQ579817_H_gloveri_a                           | Hyalophora_columbia                                                       |
| HQ579819_H_cecropia                            | Hyalophora_cecropia                                                       |
| KJ865741_Hyalophora_gloveri                    | Hyalophora_columbia                                                       |

|                                   |                      |
|-----------------------------------|----------------------|
| KJ865742_Hyalophora_gloveri       | Hyalophora_columbia  |
| KJ865743_Hyalophora_gloveri       | Hyalophora_columbia  |
| KJ865744_Hyalophora_gloveri       | Hyalophora_columbia  |
| KJ865745_Hyalophora_gloveri       | Hyalophora_columbia  |
| KJ865746_Hyalophora_gloveri       | Hyalophora_columbia  |
| KM287183_Hyalophora_cecropia      | Hyalophora_cecropia  |
| KM287184_Hyalophora_gloveri       | Hyalophora_columbia  |
| KM287185_Hyalophora_cecropia      | Hyalophora_cecropia  |
| KM287188_Hyalophora_euryalus      | Hyalophora_euryalus  |
| KM287189_Hyalophora_gloveri       | Hyalophora_gloveri_b |
| KM287190_Hyalophora_cecropia      | Hyalophora_cecropia  |
| KM287191_Hyalophora_mexicana      | Hyalophora_mexicana  |
| KM287193_Hyalophora_cecropia      | Hyalophora_cecropia  |
| KM287194_Hyalophora_gloveri       | Hyalophora_columbia  |
| KM287195_Hyalophora_cecropia      | Hyalophora_cecropia  |
| KM544952_Hyalophora_cecropia      | Hyalophora_cecropia  |
| KM995807_Hyalophora_leonis        | Hyalophora_leonis    |
| KM995808_Hyalophora_sp_columbia_a | Hyalophora_columbia  |
| KM995809_Hyalophora_leonis        | Hyalophora_leonis    |
| KM995810_Hyalophora_sp_columbia_a | Hyalophora_columbia  |
| KM995811_Hyalophora_leonis        | Hyalophora_leonis    |
| KM995812_Hyalophora_leonis        | Hyalophora_leonis    |
| KT130513_Hyalophora_cecropia      | Hyalophora_cecropia  |
| KT131868_Hyalophora_columbia      | Hyalophora_columbia  |
| KT132640_Hyalophora_cecropia      | Hyalophora_cecropia  |
| KT133088_Hyalophora_cecropia      | Hyalophora_cecropia  |
| KT137523_Hyalophora_cecropia      | Hyalophora_cecropia  |
| KT140564_Hyalophora_cecropia      | Hyalophora_cecropia  |
| KT143512_Hyalophora_cecropia      | Hyalophora_cecropia  |
| KT147422_Hyalophora_cecropia      | Hyalophora_cecropia  |

|                                                  |                      |
|--------------------------------------------------|----------------------|
| KT148193_Hyalophora_cecropia                     | Hyalophora_cecropia  |
| LBCG332_08_Hyalophora_euryalus_Kamloops          | Hyalophora_euryalus  |
| LBCG383_08_Hyalophora_euryalus_Kamloops          | Hyalophora_euryalus  |
| LNC911_06_Hyalophora_cecropia_North_Carolina     | Hyalophora_cecropia  |
| LOPN217_06_Hyalophora_euryalus_Oregon            | Hyalophora_euryalus  |
| LSUSA183_06_Hyalophora_cecropia_Kentucky         | Hyalophora_cecropia  |
| LTOL408_07_Hyalophora_gloveri_Utah               | Hyalophora_gloveri_b |
| LTOL278_07_Hyalophora_euryalus_California        | Hyalophora_euryalus  |
| LTOL436_07_Hyalophora_cecropia_Maryland          | Hyalophora_cecropia  |
| LTOL437_07_Hyalophora_euryalus_California        | Hyalophora_euryalus  |
| LTOL438_07_Hyalophora_cecropia_Colorado          | Hyalophora_cecropia  |
| RDLQF466_06_Hyalophora_columbia_Quebec           | Hyalophora_columbia  |
| RDLQF467_06_Hyalophora_columbia_Quebec           | Hyalophora_columbia  |
| RDNMF798_08_Hyalophora_columbia_Ontario          | Hyalophora_columbia  |
| RDNMF799_08_Hyalophora_gloveri_Alberta           | Hyalophora_columbia  |
| RDNMF800_08_Hyalophora_gloveri_Alberta           | Hyalophora_columbia  |
| RDNMF801_08_Hyalophora_gloveri_Alberta           | Hyalophora_columbia  |
| RDNMF802_08_Hyalophora_gloveri_Alberta           | Hyalophora_columbia  |
| RDNMF803_08_Hyalophora_gloveri_Alberta           | Hyalophora_columbia  |
| RDNMF804_08_Hyalophora_gloveri_Alberta           | Hyalophora_columbia  |
| RDNMH371_09_Hyalophora_gloveri_Arizona           | Hyalophora_columbia  |
| SATOL007_07_Hyalophora_columbia_Michigan         | Hyalophora_columbia  |
| SATOL056_07_Hyalophora_cecropia_Wisconsin_captiv | Hyalophora_cecropia  |
| SDHC360_08_Hyalophora_mexicana_Zacatecas         | Hyalophora_mexicana  |
